# Supplementary material for: Adding a solvophilic comonomer to the polymerization-induced self-assembly of block copolymer and homopolymer: a cooperative strategy for preparing large compound vesicles
Source: Royal Society of Chemistry journal article supplement (doi:10.1039/c7ra09120f), 2017-01-01
Supplement: c7ra09120f1.pdf [file c7ra09120f1.pdf]

File: Chundong Huang\_v1.0-St, 4VP-PISA\_20170702

**Adding Solvophilic Comonomer to Polymerization-Induced  
Self-Assembly of Block Copolymer and Homopolymer: A  
Cooperative Strategy for preparing Large Compound Vesicles**

Chundong Huang<sup>a</sup>, Jianbo Tan<sup>\*,a,b</sup>, Qin Xu<sup>a</sup>, Jun He<sup>a</sup>, Xueliang Li<sup>a</sup>, Dongdong Liu<sup>a</sup>, Li Zhang<sup>\*,a,b</sup>

<sup>a</sup> *Department of Polymeric Materials and Engineering, School of Materials and Energy, Guangdong University of Technology, Guangzhou 510006, China*

<sup>b</sup> *Guangdong Provincial Key Laboratory of Functional Soft Condensed Matter, Guangzhou 510006, China*

*\*Corresponding authors: tanjianbo@gdut.edu.cn, lizhang@gdut.edu.cn*

## The $^1\text{H}$ NMR spectrum of the polymerization solution and the equations

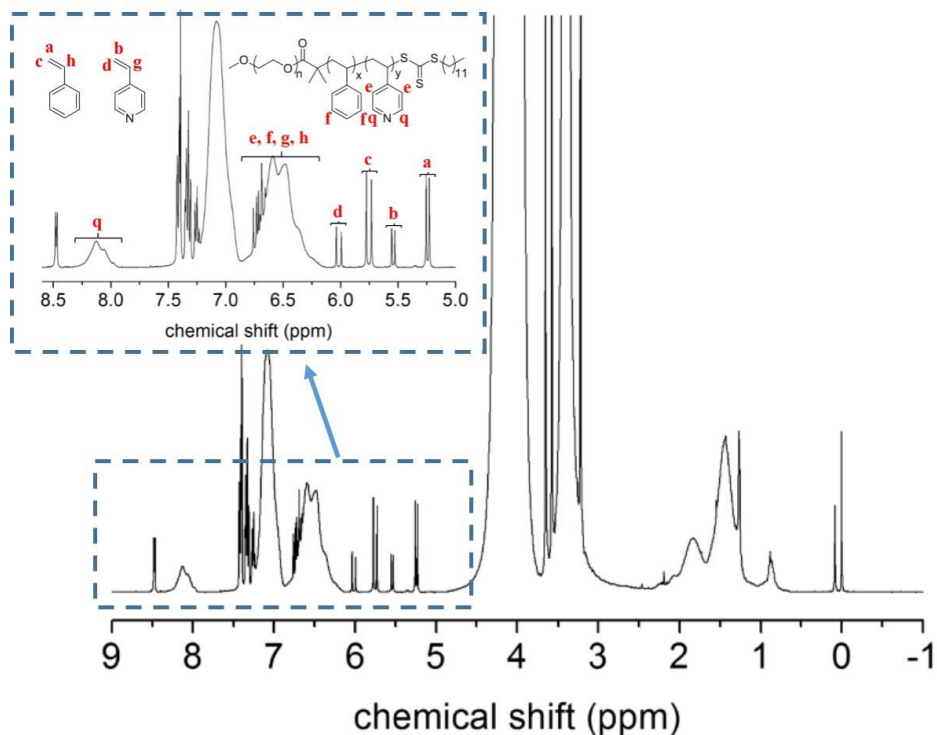

Figure S1. The  $^1\text{H}$  NMR spectrum of the polymerization solution after the RAFT dispersion polymerization of 4VP and St mediated by mPEG<sub>45</sub>-DDMAT and DDMAT in CDCl<sub>3</sub>.

$$\text{Conversion}_{4VP} \% = \frac{I_{7.9 \sim 8.4}}{I_{7.9 \sim 8.4} + I_{5.97 \sim 6.06} + I_{5.5 \sim 5.58}} \times 100\% \quad (\text{S1})$$

$$\text{Conversion}_{St} \% = \frac{I_{6.1 \sim 6.85} - I_{7.9 \sim 8.4} - I_{5.97 \sim 6.06} - I_{5.69 \sim 5.82}}{I_{6.1 \sim 6.85} - I_{7.9 \sim 8.4} - I_{5.97 \sim 6.06} + I_{5.69 \sim 5.82}} \times 100\% \quad (\text{S2})$$

$$\text{Conversion}_{St/4VP} \% = \frac{n_{St} \times \text{Conversion}_{St} + n_{4VP} \times \text{Conversion}_{4VP}}{n_{St} + n_{4VP}} \times 100\% \quad (\text{S3})$$

in which,  $n_{St}$  and  $n_{4VP}$  are the initial molar quantity of the feeding styrene and 4-vinylpyridine, respectively.

Table S1. Summary of GPC data obtained for polymer nano-objects synthesized at 15% w/w solids via RAFT dispersion polymerization of St and 4VP in methanol/water (80/20, w/w) at 70 °C with  $[m\text{PEG}_{45}\text{-DDMAT}]/[\text{DDMAT}] = 1/1$  at different  $[\text{St}]_0/[\text{4VP}]_0$  ratios (DP of 200).

| Exp. | $[\text{St}]_0/[\text{4VP}]_0$ | final compositions                                                                                           | $M_n$ (kg/mol) | $M_w/M_n$ |
|------|--------------------------------|--------------------------------------------------------------------------------------------------------------|----------------|-----------|
| 1    | 6/1                            | mPEG <sub>45</sub> -P(St <sub>133-co</sub> -4VP <sub>18</sub> )/ P(St <sub>133-co</sub> -4VP <sub>18</sub> ) | 13.6           | 1.10      |
| 2    | 5/1                            | mPEG <sub>45</sub> -P(St <sub>124-co</sub> -4VP <sub>20</sub> )/P(St <sub>124-co</sub> -4VP <sub>20</sub> )  | 12.0           | 1.10      |
| 3    | 4/1                            | mPEG <sub>45</sub> -P(St <sub>108-co</sub> -4VP <sub>24</sub> )/P(St <sub>108-co</sub> -4VP <sub>24</sub> )  | 11.1           | 1.12      |
| 4    | 3/1                            | mPEG <sub>45</sub> -P(St <sub>93-co</sub> -4VP <sub>31</sub> )/P(St <sub>93-co</sub> -4VP <sub>31</sub> )    | 10.6           | 1.13      |
| 5    | 2/1                            | mPEG <sub>45</sub> -P(St <sub>96-co</sub> -4VP <sub>49</sub> )/P(St <sub>96-co</sub> -4VP <sub>49</sub> )    | 12.0           | 1.14      |

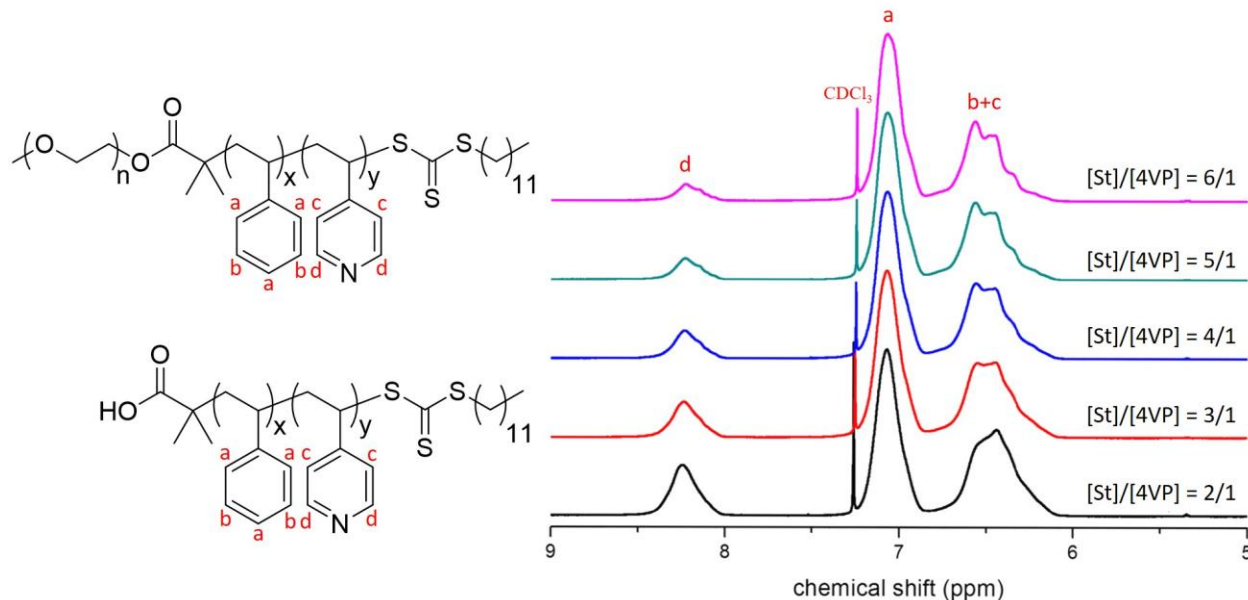

Figure S2.  $^1\text{H}$  NMR spectra of mPEG<sub>45</sub>-P(St-co-4VP)/ P(St-co-4VP) assemblies prepared via RAFT dispersion polymerization of St and 4VP with  $[m\text{PEG}_{45}\text{-DDMAT}]/[\text{DDMAT}] = 1/1$  at different  $[\text{St}]_0/[\text{4VP}]_0$  molar ratios in  $\text{CDCl}_3$ .

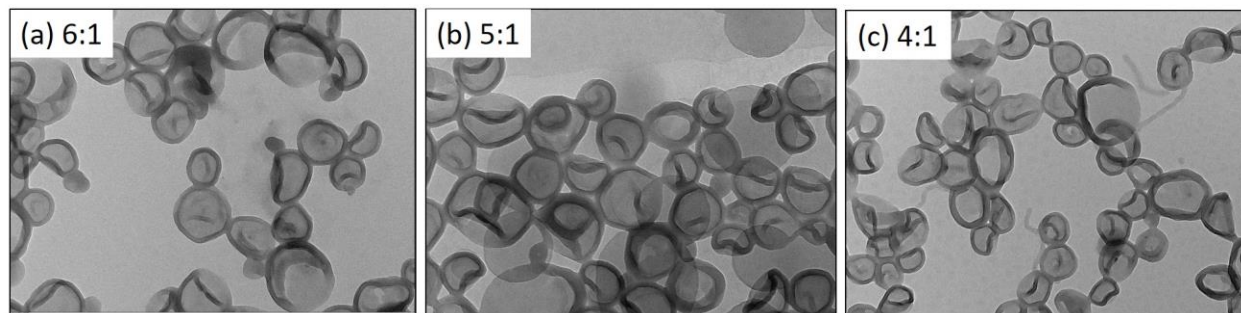

Figure S3. TEM images of polymer nano-objects prepared via RAFT dispersion polymerization of St and 4VP in methanol/water (80/20, w/w) at 70 °C mediated by mPEG<sub>45</sub>-DDMAT at different [St]<sub>0</sub>/[4VP]<sub>0</sub> ratios (target DP of 200).
